# Supplementary material for: Preparation of a high-efficiency low-toxicity CdS/C60 bactericide and investigation of the mechanism
Source: Royal Society of Chemistry journal article supplement (doi:10.1039/d3tb00597f), 2023-01-01
Supplement: d3tb00597f1.pdf [file d3tb00597f1.pdf]

## Supplementary Information

### Preparation of high efficiency low toxicity CdS/C<sub>60</sub> bactericide and investigation of mechanism

Xiufang Wei<sup>a</sup>, Yao Zhao<sup>a</sup>, Shaohua Zeng<sup>b,c</sup>, Wangyan Nie<sup>b,c</sup>, Yifeng Zhou<sup>b,c</sup>, Ying Xu<sup>a,c,\*</sup> and Pengpeng Chen<sup>b,c\*</sup>

<sup>a</sup> School of Material Science and Engineering, Anhui University, Hefei, 230601, China

<sup>b</sup> College of Chemistry and Chemical Engineering, Anhui University, Hefei, 230601, China

<sup>c</sup> Anhui Province Key Laboratory of Environmentally-friendly Polymer Materials, Hefei, 230601, China

\* To whom correspondence should be addressed. Ying Xu (yingxu@ahu.edu.cn) and Pengpeng Chen (chenpp@ahu.edu.cn).

#### Contents

**S1** Photos of agar plates of *S. aureus* treated with CdS/C<sub>60</sub> complex under darkness and illumination.

**S2** Photos of agar plates of *E. coli* treated with CdS/C<sub>60</sub> complex under darkness and illumination.

**S3** The particle size distribution of CdS and CdS/C<sub>60</sub>-2.

**S4** Sterilization kinetics curves of *E. coli* and *S. aureus* under different conditions

**S5** The cumulative amount of dissolved Cd<sup>2+</sup> of CdS and CdS/C<sub>60</sub>-2 dispersed in normal saline under light conditions.

**S6** Antibacterial effect of CdS/C<sub>60</sub>-2 filtrate after light and Cd<sup>2+</sup> solution on *S. aureus*.

**S7** Photocurrent response curves of pure CdS and different C<sub>60</sub> load levels CdS/C<sub>60</sub>

**S1** Photos of agar plates of *S. aureus* treated with CdS/C<sub>60</sub> complex under darkness and illumination.

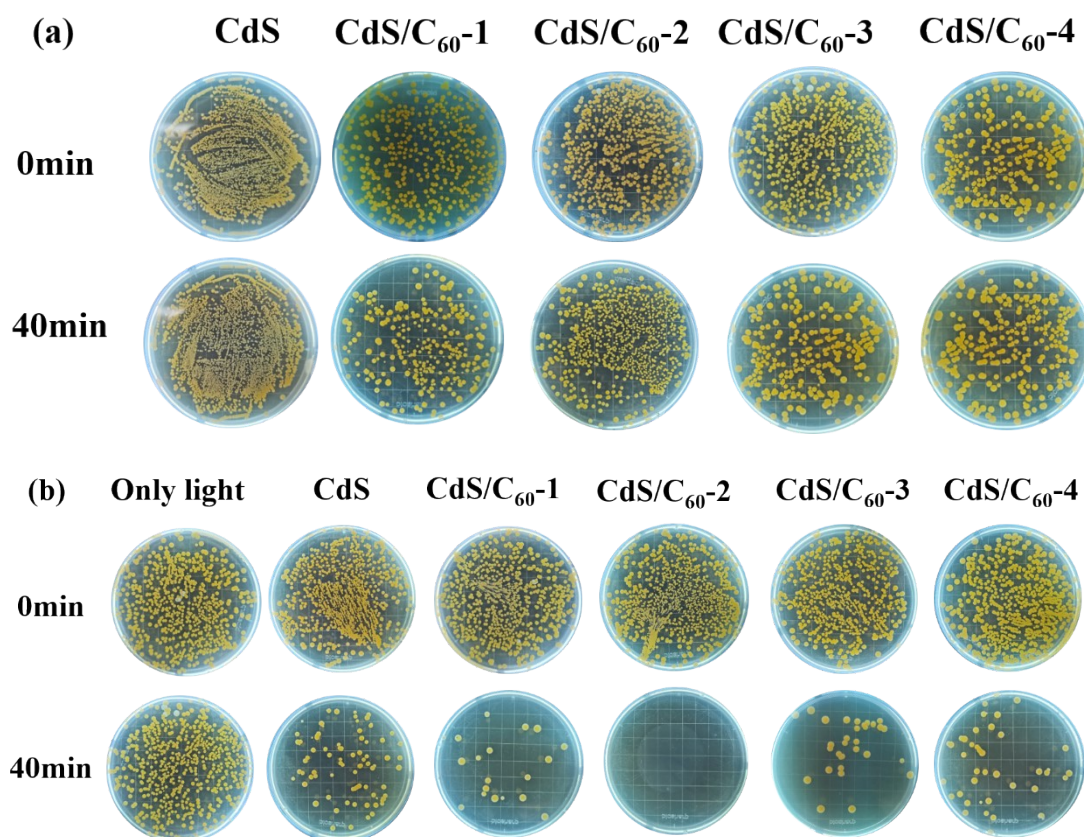

**Figure S1.** Photographs of the agar plates with CdS/C<sub>60</sub>-1、 CdS/C<sub>60</sub>-2、 CdS/C<sub>60</sub>-3、 CdS/C<sub>60</sub>-4 (100 μg/mL) was used to treat *S.aureus* (a) in the dark and (b) under 40 min illumination.

**S2** Photos of agar plates of *E.coli* treated with CdS/C<sub>60</sub> complex under darkness and illumination.

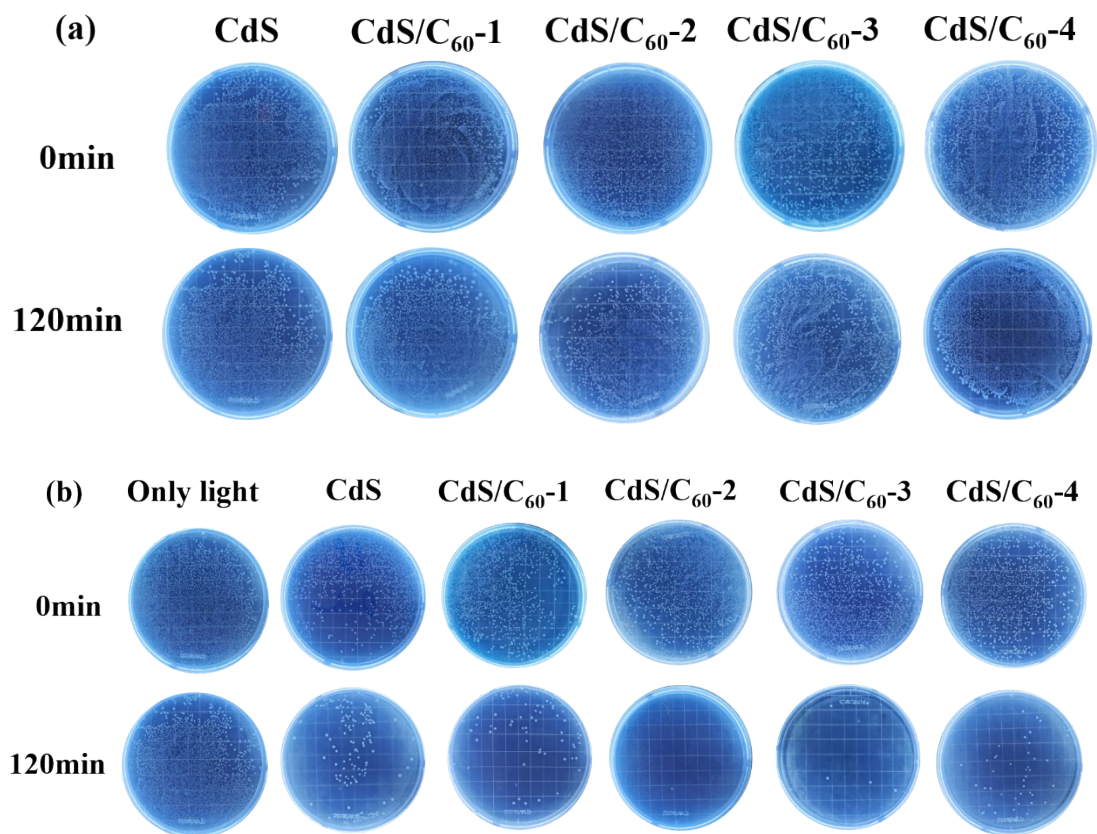

**Figure S2.** Photographs of the agar plates with CdS/C<sub>60</sub>-1、 CdS/C<sub>60</sub>-2、 CdS/C<sub>60</sub>-3、 CdS/C<sub>60</sub>-4 (100 μg/mL) was used to treat E.coli (a) in the dark and (b) under 120 min illumination.

S3 The particle size distribution of CdS and CdS/C<sub>60</sub>-2.

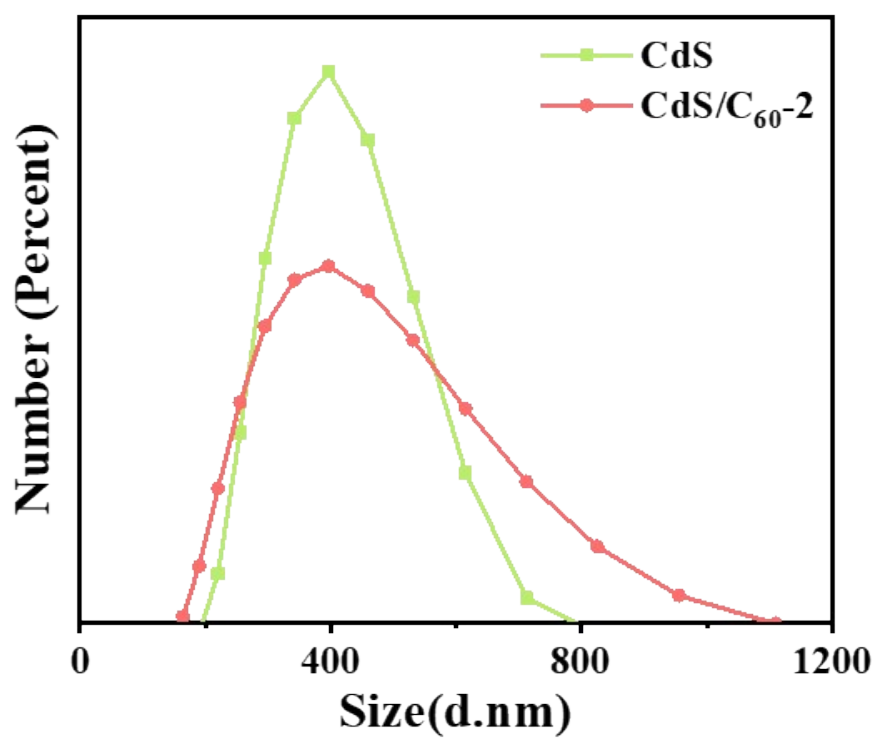

Figure S3. The particle size distribution of CdS and CdS/C<sub>60</sub>-2.

**S4 Sterilization kinetics curves of E.coli and S.aureus under different conditions**

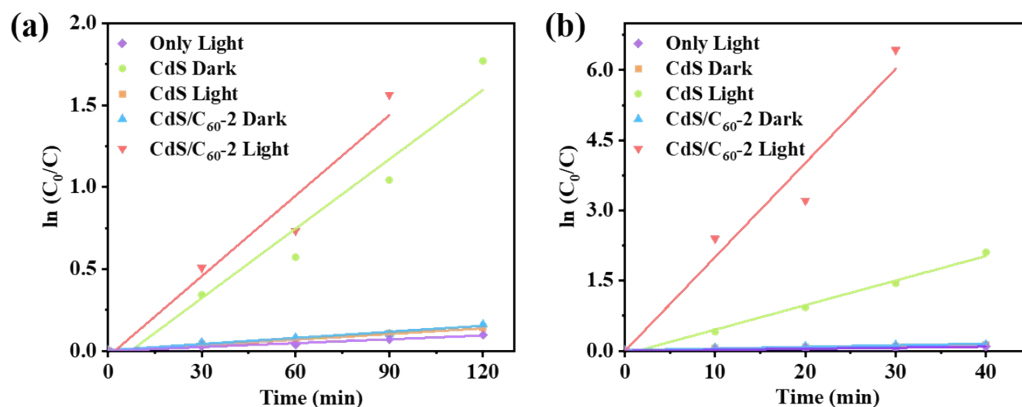

**Figure S4.** Sterilization kinetics curves of (a) E.coli (b) S.aureus under different conditions

**S5 The cumulative amount of dissolved Cd<sup>2+</sup> of CdS and CdS/C<sub>60</sub>-2 dispersed in normal saline under light conditions.**

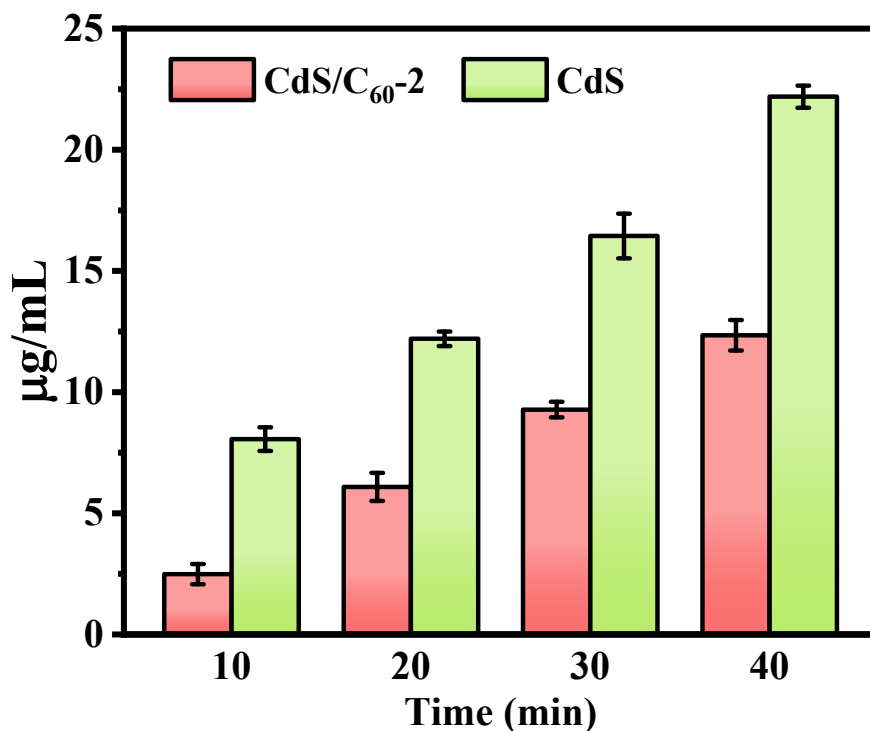

**Figure S5.** The cumulative amount of dissolved Cd<sup>2+</sup> of CdS and CdS/C<sub>60</sub>-2 dispersed in normal saline under light conditions.

**S6 Antibacterial effect of CdS/C<sub>60</sub>-2 filtrate after light and Cd<sup>2+</sup> solution on S.aureus.**

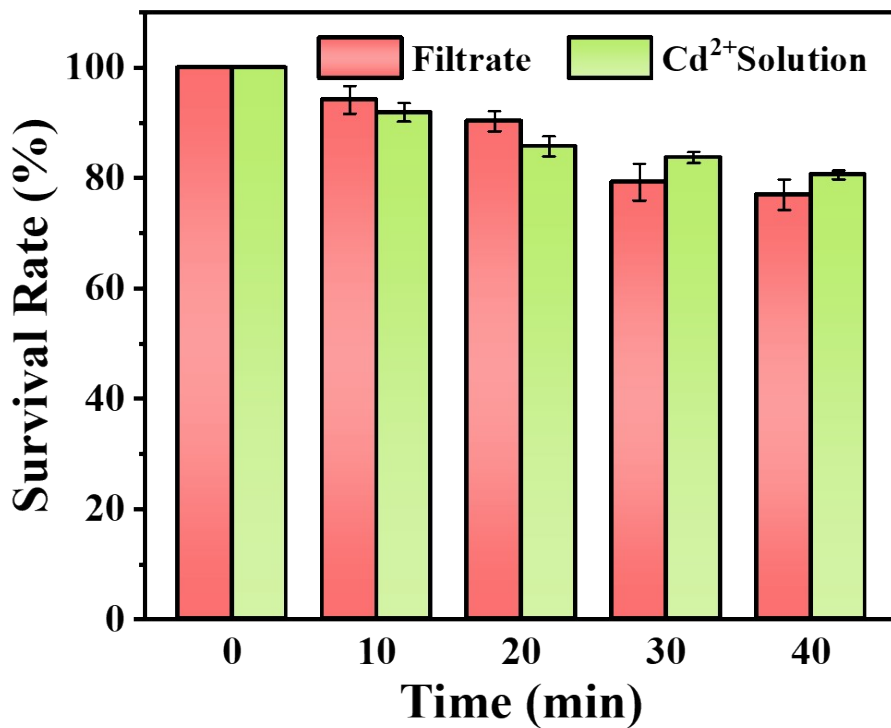

**Figure S6.** Antibacterial effect of CdS/C<sub>60</sub>-2 filtrate after light and Cd<sup>2+</sup> solution on S.aureus.

S7 Photocurrent response curves of pure CdS and different C<sub>60</sub> load levels CdS/C<sub>60</sub>

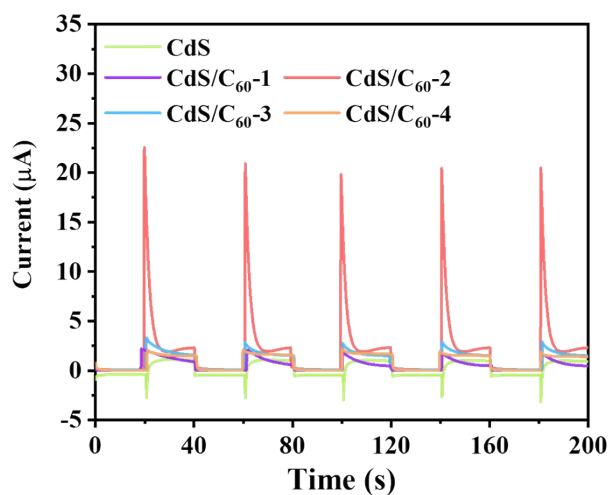

**Figure S7.** Photocurrent response curves of pure CdS and different C<sub>60</sub> load levels CdS/C<sub>60</sub>
